# Supplementary material for: The Hedgehog signaling pathway promotes chemotherapy resistance via multidrug resistance protein 1 in ovarian cancer
Source: PubMed Central journal article supplement — Oncol Rep. 2020 Oct 9;44(6):2610–20. doi: 10.3892/or.2020.7798 (PMC7640363; doi:10.3892/or.2020.7798), 2020-10-09
Supplement: Supplementary_Data.pdf [file Supplementary_Data.pdf]

Figure S1. (A) SK-OV-3 cells were transfected with shRNA-Gli2 LV. The knockdown efficiency was confirmed by reverse transcription-quantitative PCR analysis.  $**P < 0.01$  vs. control. (B) ES-2 cells were transfected with Gli2A-expressing LV. The overexpression efficiency was confirmed by western blot assays. (C) Immunoblot analysis was used to detect Flag levels in the N-Shh-conditioned medium and control medium. (D) Heat map of differentially expressed genes in GANT61-treated SKOV3 cells. A more intense red color indicated higher expression. The heat map indicated that MDR1 was downregulated in the GANT61-treated SKOV3 cells compared to DMSO-treated cells. N-Shh, N-terminal 'Hedge' domain; SK-OV-3 LV-shControl, SK-OV-3 cells transfected with LV plasmid expressing control small hairpin RNA; SK-OV-3 LV-shGli2, SK-OV-3 cells transfected with LV plasmid expressing small hairpin RNA targeting Gli2; LV-Gli2A, LV expressing Gli2; Gli2A, a constitutively active form of Gli2 with the first 984 bases of Gli2 mRNA deleted; Gli2, glioma-associated oncogene 2; MDR1, multidrug resistance protein 1; LAMA3, laminin subunit  $\alpha$ 3; LAMC2, laminin  $\gamma$ 2; MAP2K1, mitogen-activated protein kinase 1; ITGA5, integrin subunit  $\alpha$ 5; THBS1, thrombospondin-1; COL5A1, collagen type V  $\alpha$ 1 chain gene; COL1A1, collagen type I  $\alpha$ 1; ITGB4, integrin beta 4; CCND3, cyclin D3; FZD2, frizzled 2; LV, lentivirus; GANT61, Gli-antagonist 61.

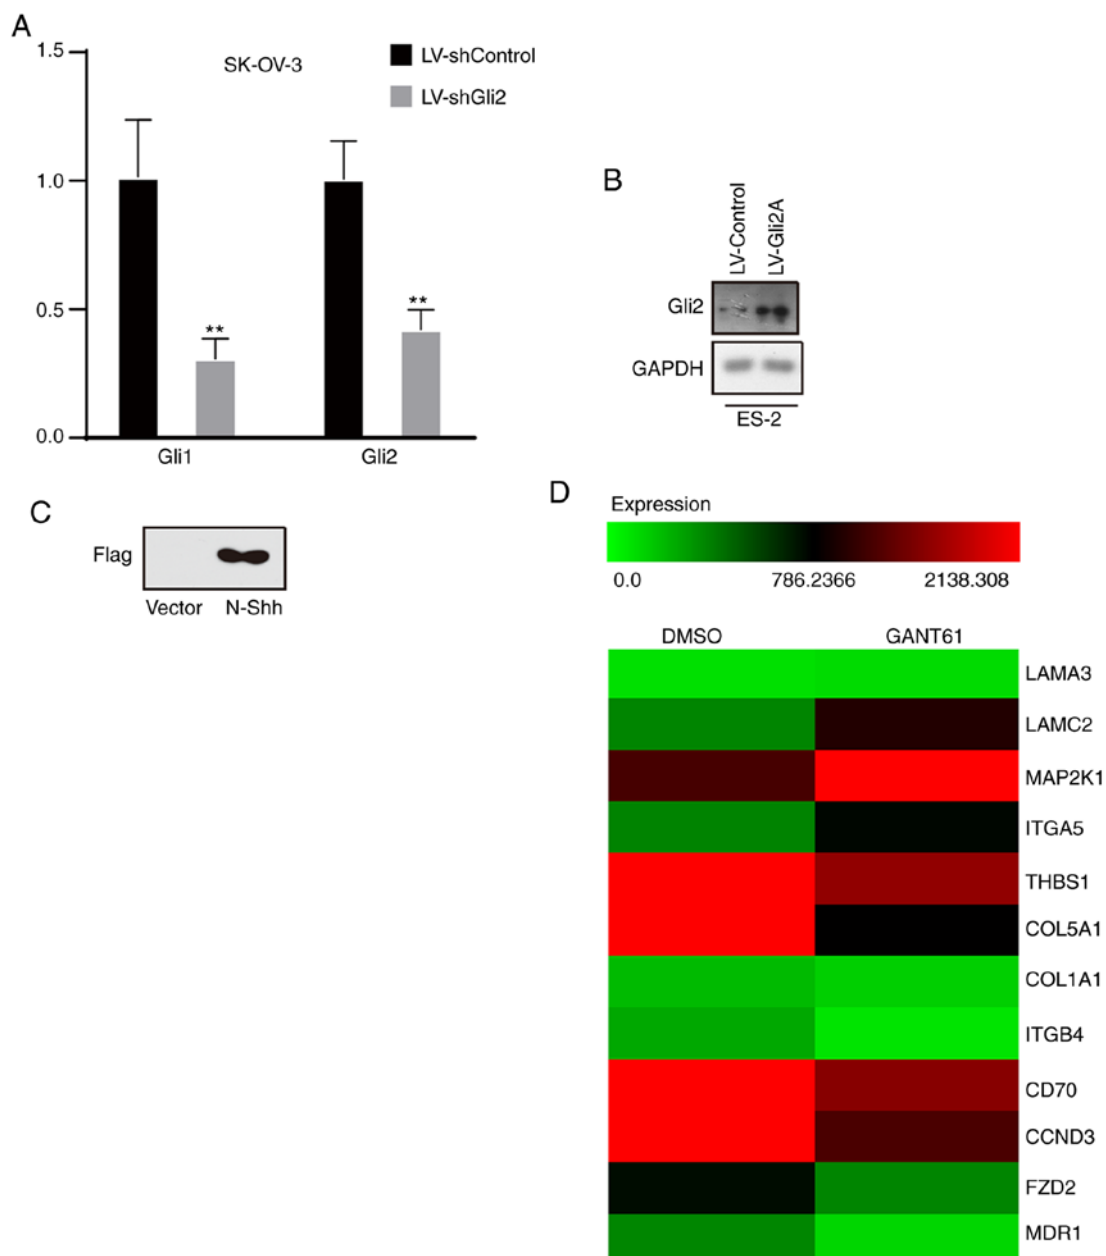

Figure S2. (A and B) SK-OV-3 cells were incubated with N-Shh for 0, 24 and 48 h. Western blot assays revealed that MDR1 expression was upregulated. Gli1 was used as a positive control. (A) Representative western blot image and (B) quantified results obtained by densitometric analysis. (C) RT-qPCR revealed a decrease in the mRNA level of MDR1 in ES-2 cells treated with GANT61 (5  $\mu$ mol/l). Gli1 was used as a positive control. (D) RT-qPCR assays were used to detect Gli1 and MDR1 expression after Gli1 overexpression in SK-OV-3 cells. Values are expressed as the mean  $\pm$  standard deviation (n=3). Data were analyzed by unpaired t-tests. \*\*P<0.01, \*\*\*P<0.001 vs. control. NS, no significance; N-Shh, N-terminal 'Hedge' domain; Gli1, glioma-associated oncogene 2; MDR1, multidrug resistance protein 1; Vector, pUB6/V5-hisB vector; GANT61, Gli-antagonist 61.

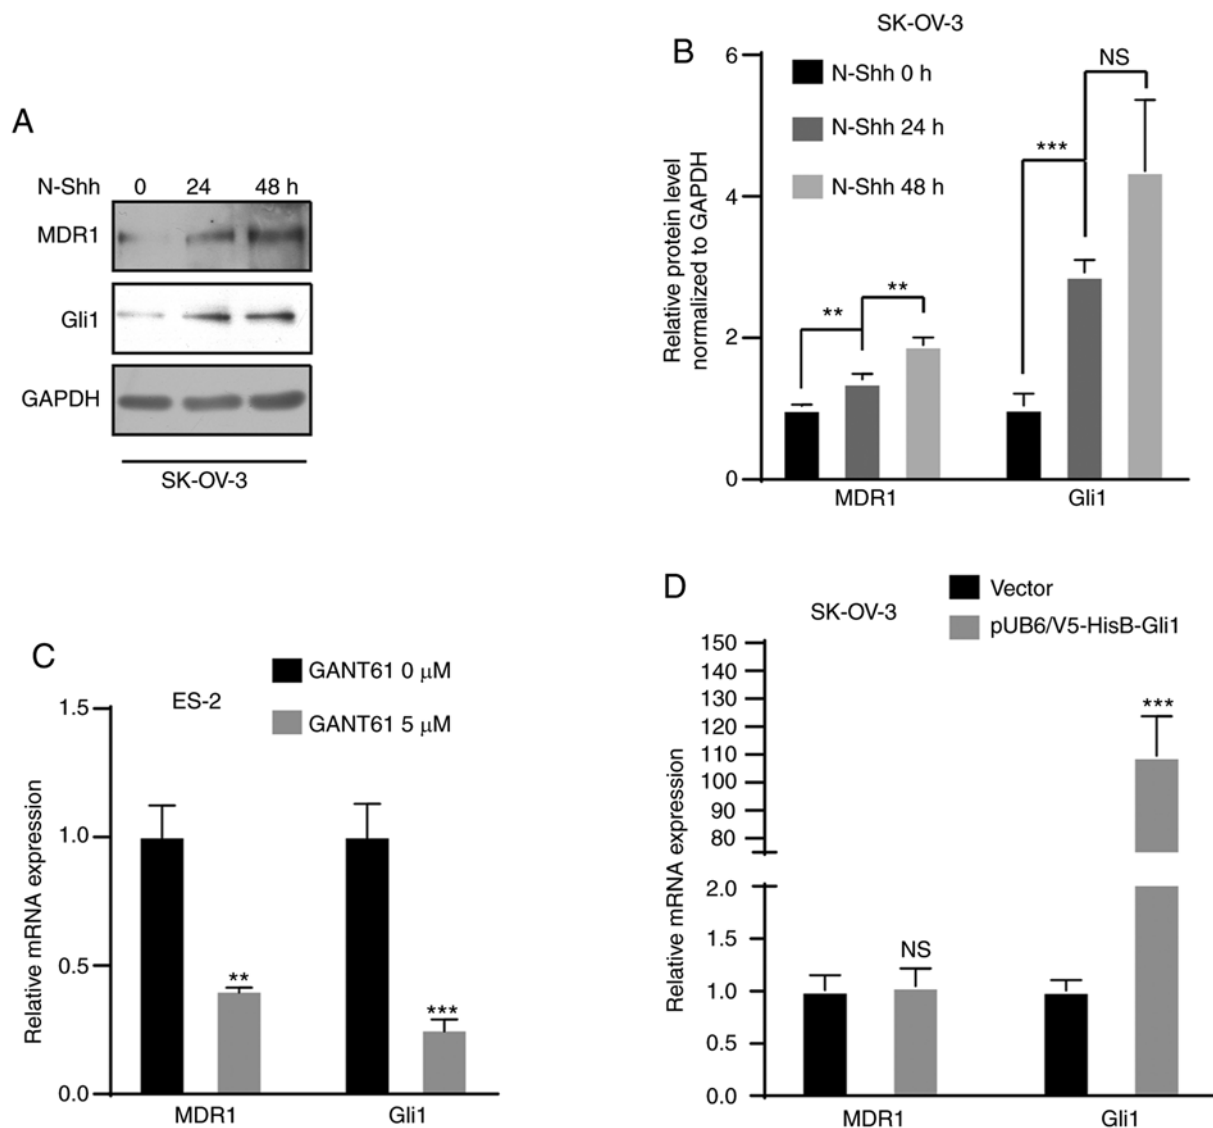

Figure S3. MTT assays indicated that verapamil, a multidrug resistance protein 1 inhibitor, increased cisplatin sensitivity in ES-2 cells with overexpression of Gli2. Cell viability was assessed by optical density measurements at 570 nm following incubation with MTT. Data were compared by analysis of variance with post-hoc test (least-significant difference). \* $P < 0.05$ , \*\* $P < 0.01$ , \*\*\* $P < 0.001$ . NS, no significance; OD570, optical density at 570 nm; DDP, cisplatin; LV-Gli2, lentivirus expressing Gli2; Gli2, glioma-associated oncogene 2.

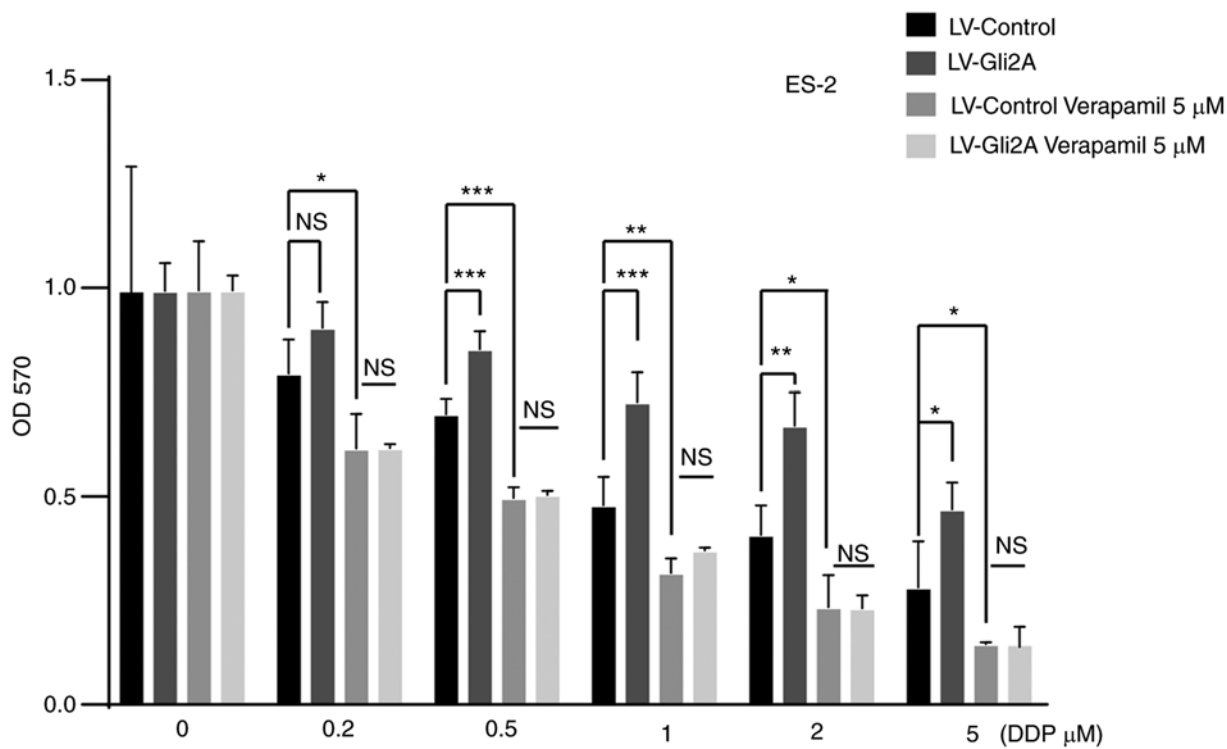

Table SI. Comparison of IC<sub>50</sub> values of cisplatin on ES-2 cells under various conditions.

| Treatment             | Mean ± SD | P-value |
|-----------------------|-----------|---------|
| ES-2 DMSO (30 μmol/l) | 3.88±0.66 | 0.005   |
| ES-2 cyclopamine      | 1.26±0.44 |         |
| ES-2 DMSO (5 μmol/l)  | 1.16±0.23 | 0.045   |
| ES-2 GANT61           | 0.61±0.24 |         |
| ES-2 LV-Control       | 0.29±0.16 | 0.032   |
| ES-2 LV-Gli2A         | 1.04±0.37 |         |

Cyclopamine is an inhibitor of Smoothed. DMSO, dimethyl sulf-oxide; SD, standard deviation; LV-Gli2A, lentivirus overexpressing activated Gli2; Gli2, glioma-associated oncogene 2; GANT61, Gli-antagonist 61; Gli2A, active form of Gli2 where the first 984 bases of Gli2 mRNA were deleted.
